# Supplementary material for: A time-course transcriptome analysis of wax gourd fruit development reveals predominant genes regulating taste and nutrition
Source: Front Plant Sci. 2022 Sep 8;13:971274. doi: 10.3389/fpls.2022.971274 (PMC9493329; doi:10.3389/fpls.2022.971274)
Supplement: Supplementary file 8 [file Table_2.XLSX]

## Sheet: Sheet1
Supplementary Table 2. Summary of DEGs number identified for wax gourd developmental stages.
compare	all	up	down	threshold
B_5dvsB_0d	937	546	391	DESeq2 padj<=0.05 |log2FoldChange|>=0.0
B_10dvsB_0d	6019	3073	2946	DESeq2 padj<=0.05 |log2FoldChange|>=0.0
B_20dvsB_0d	11691	5664	6027	DESeq2 padj<=0.05 |log2FoldChange|>=0.0
B_30dvsB_0d	10605	5060	5545	DESeq2 padj<=0.05 |log2FoldChange|>=0.0
B_10dvsB_5d	2519	1301	1218	DESeq2 padj<=0.05 |log2FoldChange|>=0.0
B_20dvsB_5d	10222	4927	5295	DESeq2 padj<=0.05 |log2FoldChange|>=0.0
B_30dvsB_5d	8269	3852	4417	DESeq2 padj<=0.05 |log2FoldChange|>=0.0
B_20dvsB_10d	7058	3228	3830	DESeq2 padj<=0.05 |log2FoldChange|>=0.0
B_30dvsB_10d	4544	1753	2791	DESeq2 padj<=0.05 |log2FoldChange|>=0.0
B_30dvsB_20d	7489	3473	4016	DESeq2 padj<=0.05 |log2FoldChange|>=0.0
G_30dvsB_30d	4718	2356	2362	DESeq2 padj<=0.05 |log2FoldChange|>=0.0
